# Supplementary material for: Qualitative study of patients with venous malformations: symptom experiences and content validity of patient-reported outcome measures
Source: Springer Nature journal article supplement (doi:10.1007/s11136-020-02435-3), 2020-02-04
Supplement: MOESM3 [file 17708692]

**Appendix Table 2: Search strategy PUBMED**

| **No.** | **Query** | **Results** |
| --- | --- | --- |
| #1 | Search **(("Venous Malformations, Multiple Cutaneous and Mucosal" [Supplementary Concept]) OR "Hyperkeratotic Cutaneous Capillary-Venous Malformations Associated With Cerebral Capillary Malformations" [Supplementary Concept]) OR "Spinal Arterial Venous Malformations with Cutaneous Hemangiomas" [Supplementary Concept]** | 4 |
| #2 | Search **(“vascular anomalies”[tiab] OR “vascular anomaly”[tiab] OR ”congenital vascular malformations”[tiab] OR ”congenital vascular malformation”[tiab] OR “venous malformations”[tiab] OR “venous malformation”[tiab])** | 4293 |
| #3 | Search **(#1 OR #2)** | 4295 |
| #4 | Search **("Interviews as Topic"[Mesh] OR interview[tiab] OR interviews[tiab] OR interviewed[tiab] OR interviewing[tiab] OR "questionnaires"[MeSH Terms] OR questionnaire[TIAB] OR questionnaires[TIAB] OR survey[TIAB] OR surveys[TIAB] OR scale[TIAB] OR scales[TIAB] OR index[TIAB] OR diary[TIAB] OR diaries[TIAB] OR inventory[TIAB] OR inventories[TIAB] OR score[TIAB] OR scores[TIAB] OR profile[tiab] OR profiles[tiab]) AND ("quality of life"[MESH] OR "quality of life"[TIAB] OR HRQL[TIAB] OR HRQOL[TIAB] OR QOL[TIAB] OR well-being[tiab] OR qualitative[TIAB] OR "Qualitative Research"[Mesh] OR “life quality”[tiab] OR “value of life”[tiab] OR "Value of Life"[Mesh] OR "Patient Satisfaction"[Mesh] OR "patient satisfaction"[TIAB] OR "patients satisfaction"[TIAB] OR "patient reported"[TIAB] OR "Self Report"[Mesh] OR "self report"[TIAB] OR "self reported"[TIAB] OR “self reporting”[TIAB] OR "Patient Preference"[Mesh] OR “patient preference”[TIAB] OR “patient preferences”[TIAB] OR “patients preference”[TIAB] OR “patients preferences”[TIAB] OR “patient assessment”[TIAB] OR “patient assessments”[TIAB] OR “patient assessed”[TIAB] OR “self evaluation”[TIAB] OR “self evaluations”[TIAB] OR “patient rating”[TIAB] OR “patient ratings”[TIAB] OR “patient rated”[TIAB] OR “patients rating”[TIAB] OR “patients ratings”[TIAB] OR “patients rated”[TIAB] OR “self-completed”[TIAB] OR “self-administered”[TIAB] OR “self assessment”[TIAB] OR “self assessments”[TIAB] OR “patient based outcome”[TIAB] OR "Self-Evaluation Programs"[Mesh] OR qualitative[TIAB] OR experience[TIAB] OR experiences[TIAB] OR “patient completed”[TIAB]))** | 388593 |
| #5 | Search **Animals[Mesh] NOT human[Mesh]** | 3943531 |
| #6 | Search **(#3 AND #4) NOT #5 NOT (comment[pt] OR editorial[pt] OR letter[pt]) Filters: English** | 44 |
